## Correction: Th1high in tumor microenvironment is an indicator of poor prognosis for patients with NSCLC

Huang Jian<sup>1,2</sup>, Shen Fangrong<sup>3</sup>, Huang Haitao<sup>4</sup>, Ling Chunhua<sup>1</sup>, Zhang Guangbo<sup>4</sup>

Copyright: Jian, et al. This is an open-access article distributed under the terms of the Creative Commons Attribution License (CC-BY), which permits unrestricted use, distribution, and reproduction in any medium, provided the original author and source are credited.

**Present:** Author contributions were not correctly attributed..

**Correct:** The proper author contributions are shown below.

Huang Jian and Shen Fangrong have contributed to this work and are co-first authors.

Original article: Oncotarget. 2017; 8:13116-13125. doi: 10.18632/oncotarget.14471
